# Supplementary material
Source: HighWire-hosted journal article supplement (https://bmjopen.bmj.com/content/12/9/e059273)

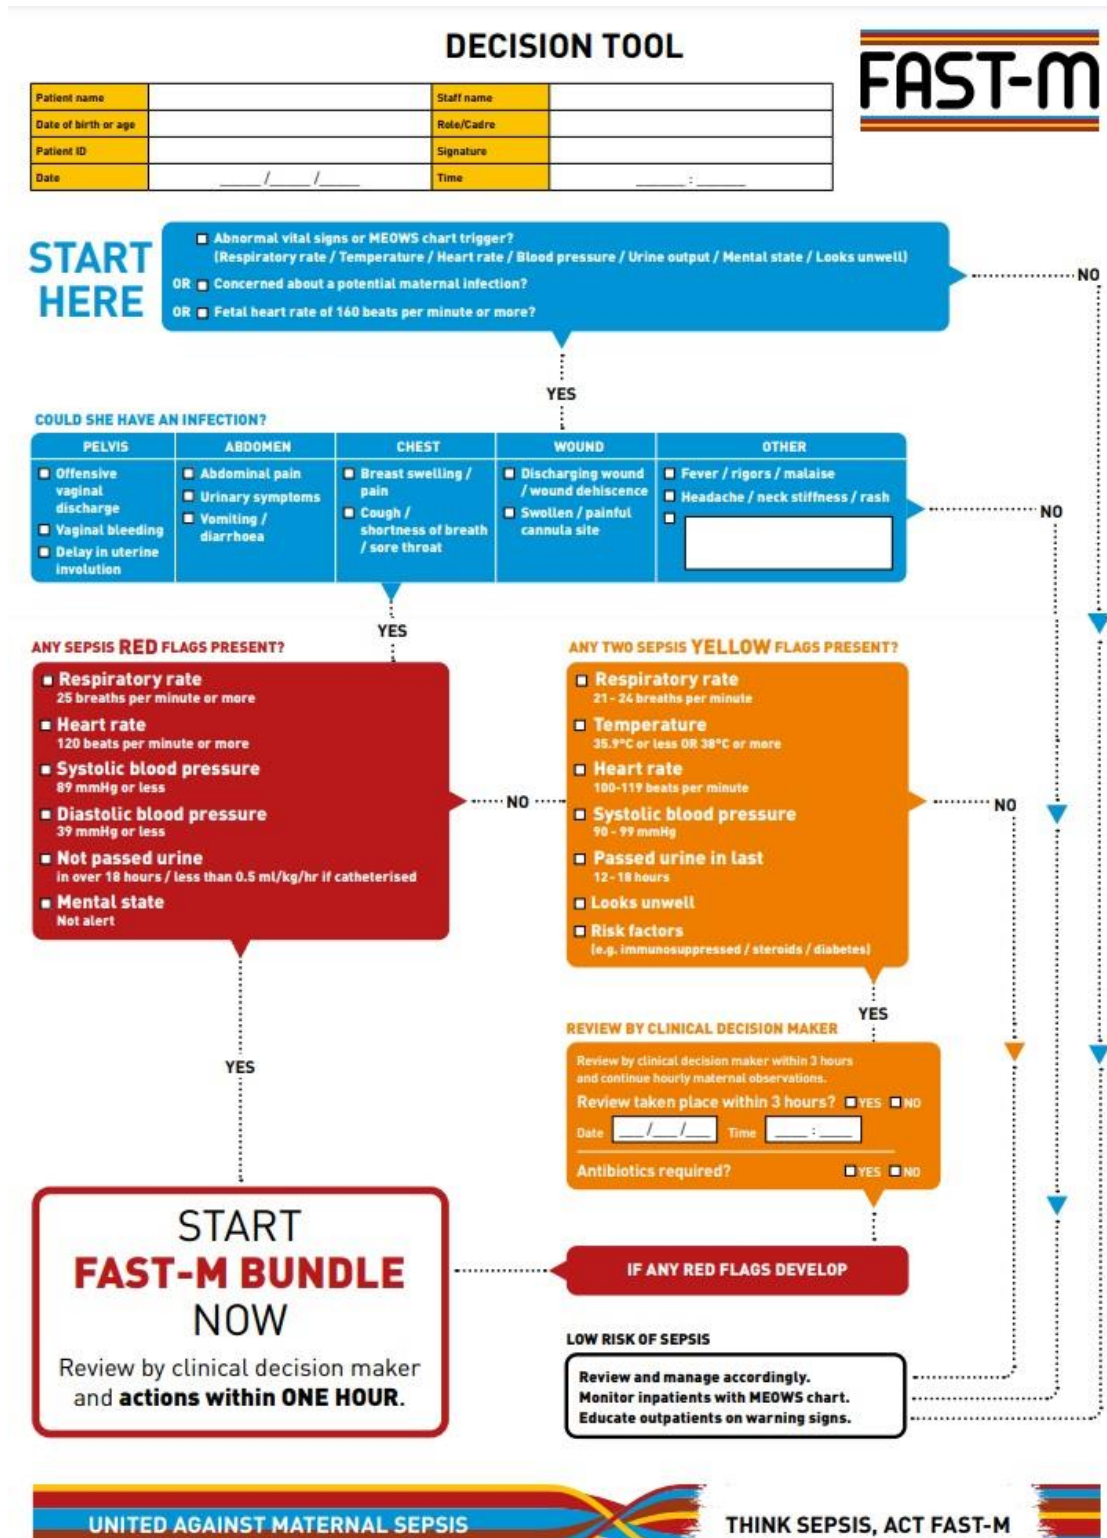

### TREATMENT BUNDLE

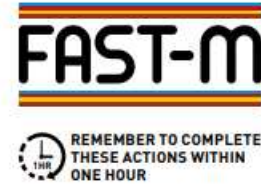

|                                     |             |                            |             |                                                  |             |
|-------------------------------------|-------------|----------------------------|-------------|--------------------------------------------------|-------------|
| Patient name                        |             |                            | Staff name  |                                                  |             |
| D.O.B or age                        |             |                            | Role/Cadre  |                                                  |             |
| Patient ID                          |             |                            | Signature   |                                                  |             |
| Date & time of red flag observation | ___/___/___ | Date & time bundle started | ___/___/___ | Date & time of review by clinical decision maker | ___/___/___ |

|          |                                                                                                                                                       |                                                                                                                                                                                                           |             |                       |                              |                                |                                                          |                                                                                                                     |
|----------|-------------------------------------------------------------------------------------------------------------------------------------------------------|-----------------------------------------------------------------------------------------------------------------------------------------------------------------------------------------------------------|-------------|-----------------------|------------------------------|--------------------------------|----------------------------------------------------------|---------------------------------------------------------------------------------------------------------------------|
| <b>F</b> | <b>FLUIDS (caution in pre-eclampsia, severe anaemia and pulmonary oedema)</b>                                                                         | Date                                                                                                                                                                                                      | ___/___/___ | Time fluids initiated | ___:___                      | Initials                       |                                                          | <b>Give 500 ml crystalloid immediately. Repeat 500 ml boluses to a maximum of 30 ml/kg if hypotension persists.</b> |
|          | Details / reason not completed                                                                                                                        |                                                                                                                                                                                                           |             |                       |                              |                                |                                                          |                                                                                                                     |
| <b>A</b> | <b>ANTIBIOTICS</b>                                                                                                                                    | Date                                                                                                                                                                                                      | ___/___/___ | Time started          | ___:___                      | Initials                       |                                                          | <b>See antibiotic guidelines below</b>                                                                              |
|          | Details / reason not completed                                                                                                                        |                                                                                                                                                                                                           |             |                       |                              |                                |                                                          |                                                                                                                     |
| <b>S</b> | <b>SOURCE – identify and treat the source of infection</b>                                                                                            | Date                                                                                                                                                                                                      | ___/___/___ | Time considered       | ___:___                      | Initials                       |                                                          | <b>See source identification and treatment boxes below</b>                                                          |
|          | Details / reason not completed                                                                                                                        |                                                                                                                                                                                                           |             |                       |                              |                                |                                                          |                                                                                                                     |
| <b>T</b> | <b>TRANSPORT (to higher level hospital or location within hospital, if required)</b>                                                                  | Date & time transport considered                                                                                                                                                                          | ___/___/___ | Initials              |                              | Transport Required             | <input type="checkbox"/> YES <input type="checkbox"/> NO |                                                                                                                     |
|          | Date & time transport requested                                                                                                                       | ___/___/___                                                                                                                                                                                               | Initials    |                       | <input type="checkbox"/> N/A |                                |                                                          |                                                                                                                     |
|          | Date & time patient left facility                                                                                                                     | ___/___/___                                                                                                                                                                                               | Initials    |                       |                              |                                |                                                          |                                                                                                                     |
|          | Destination                                                                                                                                           |                                                                                                                                                                                                           |             |                       |                              |                                |                                                          |                                                                                                                     |
|          | Reason for any delay                                                                                                                                  |                                                                                                                                                                                                           |             |                       |                              |                                |                                                          |                                                                                                                     |
| <b>m</b> | <b>MONITORING (start MEOWS chart if not already started. Repeat observations every 30 minutes until otherwise decided by clinical decision maker)</b> | Date & time monitoring commenced                                                                                                                                                                          | ___/___/___ | Initials              |                              | Details / reason not completed |                                                          |                                                                                                                     |
|          | Maternal / fetal monitoring should include                                                                                                            | <ul style="list-style-type: none"> <li>Respiratory rate</li> <li>Temperature</li> <li>Heart rate</li> <li>Blood pressure</li> <li>Urine output</li> <li>Mental state</li> <li>Fetal heart rate</li> </ul> |             |                       |                              |                                |                                                          |                                                                                                                     |
|          | Neonatal monitoring and review commenced                                                                                                              | <input type="checkbox"/> YES <input type="checkbox"/> NO <input type="checkbox"/> N/A                                                                                                                     |             |                       |                              |                                |                                                          |                                                                                                                     |

|                                                                                                                                                                                                                                                                                             |
|---------------------------------------------------------------------------------------------------------------------------------------------------------------------------------------------------------------------------------------------------------------------------------------------|
| <b>ANTIBIOTIC GUIDELINES</b>                                                                                                                                                                                                                                                                |
| Insert local guidance here                                                                                                                                                                                                                                                                  |
| <b>Immediate treatment for Maternal Sepsis:</b>                                                                                                                                                                                                                                             |
| <ul style="list-style-type: none"> <li>Ceftriaxone 2 g IV once daily (if no IV access this can be given as 2 IM injections of 1 g in different sites).</li> <li>If possible intra-abdominal source add Metronidazole 500 mg IV three times daily or 400 mg PO three times daily.</li> </ul> |
| <b>If above antibiotic regime is not available then give:</b>                                                                                                                                                                                                                               |
| <ul style="list-style-type: none"> <li>Chloramphenicol 1 g IV/IM four times daily plus Gentamycin 240 mg IV/IM once daily.</li> </ul>                                                                                                                                                       |
| <b>If maternal infection source is known, or as soon as it is identified:</b>                                                                                                                                                                                                               |
| <ul style="list-style-type: none"> <li>Use specific treatment based on Malawi Standard Treatment Guidelines.</li> </ul>                                                                                                                                                                     |

|                                                                                                                                                                                                                                                                                                                                                                                                          |
|----------------------------------------------------------------------------------------------------------------------------------------------------------------------------------------------------------------------------------------------------------------------------------------------------------------------------------------------------------------------------------------------------------|
| <b>IDENTIFY THE SOURCE</b>                                                                                                                                                                                                                                                                                                                                                                               |
| <b>Consider</b>                                                                                                                                                                                                                                                                                                                                                                                          |
| <ul style="list-style-type: none"> <li>Clinical history</li> <li>Clinical examination</li> <li>Blood tests (if available) [FBC, U&amp;Es, LFTs, CRP, clotting]</li> <li>Blood cultures</li> <li>HIV and Malaria testing</li> <li>Urine sample</li> <li>Swabs (wound, vagina, throat)</li> <li>Sputum sample</li> <li>Imaging (abdominal, chest)</li> <li>Lumbar puncture</li> <li>Other _____</li> </ul> |
| <b>REMOVE / TREAT THE SOURCE</b>                                                                                                                                                                                                                                                                                                                                                                         |
| <b>Consider</b>                                                                                                                                                                                                                                                                                                                                                                                          |
| <ul style="list-style-type: none"> <li>Malaria treatment</li> <li>Consider delivery of baby</li> <li>Removal of retained products of conception</li> <li>Debridement of wound / drainage of collection</li> <li>Removal of infected cannula / line</li> <li>Hysterectomy</li> <li>Targeted antibiotics once source known</li> </ul>                                                                      |

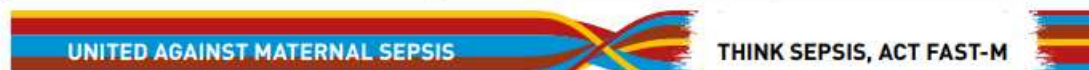

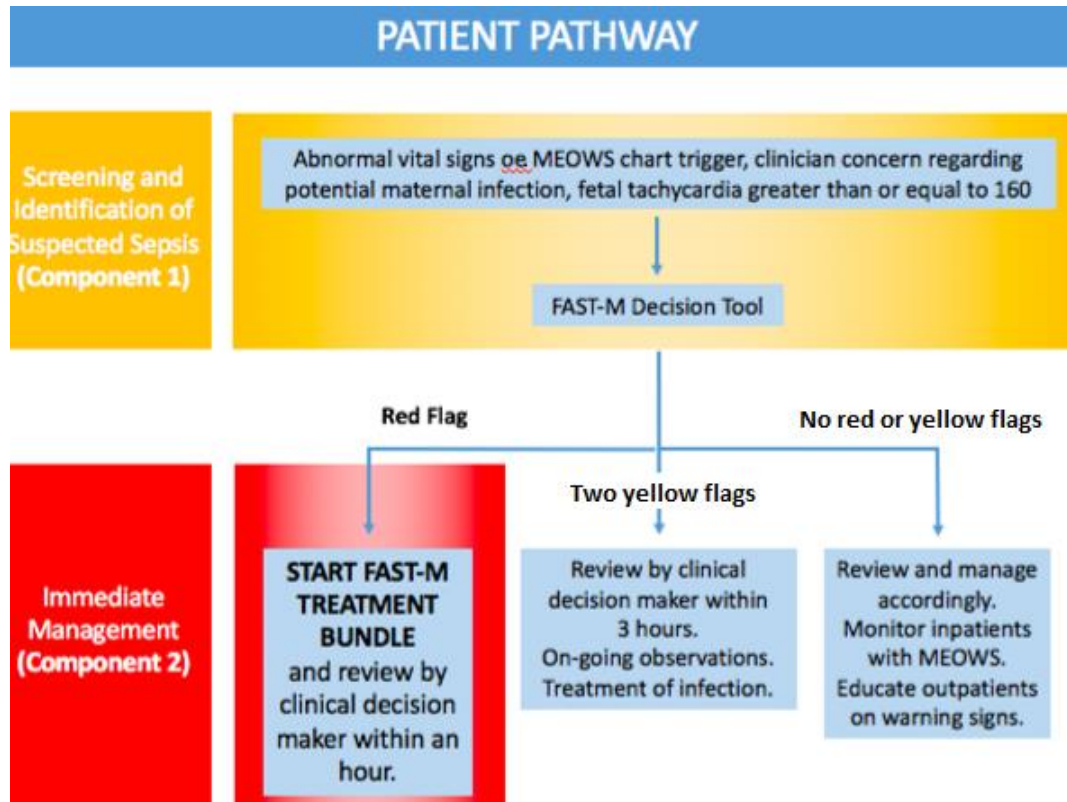

Supplement: inline-supplementary-material-3 [file inline-supplementary-material-3.pdf]
