# Supplementary material
Source: HighWire-hosted journal article supplement (https://bmjopen.bmj.com/content/12/9/e059273)

**MODIFIED EARLY OBSTETRIC WARNING CHART (MEOWS CHART)**

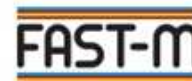

Contact clinical decision maker if patient triggers **ONE RED** or **TWO YELLOW** flags at any one time.

|          |  |  |  |  |            |  |  |  |  |         |  |  |  |  |  |  |
|----------|--|--|--|--|------------|--|--|--|--|---------|--|--|--|--|--|--|
| Patient  |  |  |  |  | Patient ID |  |  |  |  | DOB/Age |  |  |  |  |  |  |
| Date     |  |  |  |  |            |  |  |  |  |         |  |  |  |  |  |  |
| Time     |  |  |  |  |            |  |  |  |  |         |  |  |  |  |  |  |
| Initials |  |  |  |  |            |  |  |  |  |         |  |  |  |  |  |  |

WRITE VALUES IN BOXES PROVIDED

|                                                            |                                              |        |  |  |  |  |  |  |  |  |  |  |  |  |  |  |  |
|------------------------------------------------------------|----------------------------------------------|--------|--|--|--|--|--|--|--|--|--|--|--|--|--|--|--|
| Respiratory rate (breaths per minute)                      | 25 or more                                   | RED    |  |  |  |  |  |  |  |  |  |  |  |  |  |  |  |
|                                                            | 21 - 24                                      | YELLOW |  |  |  |  |  |  |  |  |  |  |  |  |  |  |  |
|                                                            | 11 - 20                                      | NORMAL |  |  |  |  |  |  |  |  |  |  |  |  |  |  |  |
|                                                            | 10 or less                                   | RED    |  |  |  |  |  |  |  |  |  |  |  |  |  |  |  |
| Oxygen saturations (%)                                     | 95 or more                                   | NORMAL |  |  |  |  |  |  |  |  |  |  |  |  |  |  |  |
|                                                            | 94 or less OR needing oxygen                 | RED    |  |  |  |  |  |  |  |  |  |  |  |  |  |  |  |
| Temperature (°C)                                           | 38 or more                                   | YELLOW |  |  |  |  |  |  |  |  |  |  |  |  |  |  |  |
|                                                            | 36.0 to 37.9                                 | NORMAL |  |  |  |  |  |  |  |  |  |  |  |  |  |  |  |
|                                                            | 35.9 or less                                 | YELLOW |  |  |  |  |  |  |  |  |  |  |  |  |  |  |  |
| Heart rate (beats per minute)                              | 120 or more                                  | RED    |  |  |  |  |  |  |  |  |  |  |  |  |  |  |  |
|                                                            | 100 - 119                                    | YELLOW |  |  |  |  |  |  |  |  |  |  |  |  |  |  |  |
|                                                            | 50 - 99                                      | NORMAL |  |  |  |  |  |  |  |  |  |  |  |  |  |  |  |
|                                                            | 40 - 49                                      | YELLOW |  |  |  |  |  |  |  |  |  |  |  |  |  |  |  |
| Systolic blood pressure (mmHg)                             | 120 or more                                  | RED    |  |  |  |  |  |  |  |  |  |  |  |  |  |  |  |
|                                                            | 140 - 159                                    | YELLOW |  |  |  |  |  |  |  |  |  |  |  |  |  |  |  |
|                                                            | 100 - 139                                    | NORMAL |  |  |  |  |  |  |  |  |  |  |  |  |  |  |  |
|                                                            | 90 - 99                                      | YELLOW |  |  |  |  |  |  |  |  |  |  |  |  |  |  |  |
| Diastolic blood pressure (mmHg)                            | 89 or less                                   | RED    |  |  |  |  |  |  |  |  |  |  |  |  |  |  |  |
|                                                            | 110 or more                                  | RED    |  |  |  |  |  |  |  |  |  |  |  |  |  |  |  |
|                                                            | 90 - 109                                     | YELLOW |  |  |  |  |  |  |  |  |  |  |  |  |  |  |  |
|                                                            | 40 - 89                                      | NORMAL |  |  |  |  |  |  |  |  |  |  |  |  |  |  |  |
| Urine output (hours since patient passed urine (tick box)) | 12 hours or less                             | NORMAL |  |  |  |  |  |  |  |  |  |  |  |  |  |  |  |
|                                                            | 12 - 18 hours                                | YELLOW |  |  |  |  |  |  |  |  |  |  |  |  |  |  |  |
|                                                            | 18 hours or more OR less than 0.5 mL/kg/hour | RED    |  |  |  |  |  |  |  |  |  |  |  |  |  |  |  |
| Mental State (tick box)                                    | Alert                                        | NORMAL |  |  |  |  |  |  |  |  |  |  |  |  |  |  |  |
|                                                            | Not Alert                                    | RED    |  |  |  |  |  |  |  |  |  |  |  |  |  |  |  |
| Looks unwell (tick box)                                    | No                                           | NORMAL |  |  |  |  |  |  |  |  |  |  |  |  |  |  |  |
|                                                            | Yes                                          | YELLOW |  |  |  |  |  |  |  |  |  |  |  |  |  |  |  |
| <b>TOTAL YELLOW FLAGS</b>                                  |                                              |        |  |  |  |  |  |  |  |  |  |  |  |  |  |  |  |
| <b>TOTAL RED FLAGS</b>                                     |                                              |        |  |  |  |  |  |  |  |  |  |  |  |  |  |  |  |
| <b>ACTION TAKEN (IF REQUIRED) Yes (Y) / No (N)</b>         |                                              |        |  |  |  |  |  |  |  |  |  |  |  |  |  |  |  |

## DECISION TOOL

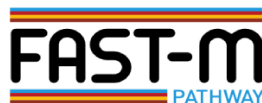

|                             |             |                   |         |
|-----------------------------|-------------|-------------------|---------|
| <b>Patient name</b>         |             | <b>Staff name</b> |         |
| <b>Date of birth or age</b> |             | <b>Role</b>       |         |
| <b>Patient ID</b>           |             | <b>Signature</b>  |         |
| <b>Date</b>                 | ___/___/___ | <b>Time</b>       | ___:___ |

**START HERE**

- Abnormal vital signs (Resp rate / Temp / HR / BP / Urine output / Mental state) or MEOWS chart trigger
- OR
- Concerned about a potential maternal infection
- OR
- Fetal tachycardia (greater than or equal to 160 beats per minute)

**COULD SHE HAVE AN INFECTION?**

- Abdominal pain or distension
- Breast abscess / mastitis
- Chorioamnionitis / endometritis
- Infected cannula / line
- Infected perineal / abdominal wound
- Lower respiratory tract infection
- Meningitis
- Severe sore throat
- Urinary tract infection
- Yes, but source unclear
- Other (specify)

**ANY SEPSIS RED FLAG PRESENT?**

- Respiratory rate **25 breaths per minute or more**
- Oxygen saturations **94% or less OR oxygen needed to keep saturations 95% or more**
- Heart rate **120 beat per minute or more**
- Systolic blood pressure **89 mmHg or less**
- Not passed urine **in over 18 hours/less than 0.5 ml/kg/hr if catheterized**
- Mental state **Not Alert**

**ANY TWO SEPSIS YELLOW FLAGS PRESENT?**

- Respiratory rate **21 - 24 breaths per minute**
- Temperature **35.9°C or less OR 38°C or more**
- Heart rate **100-119 beats per minute**
- Systolic blood pressure **90 - 99 mmHg**
- Passed urine in last **12-18 hours**
- Looks unwell
- Risk factors (e.g. immunosuppressed / steroids / diabetes)

**REVIEW BY CLINICAL DECISION MAKER**

Review by clinical decision maker within 3 hours and continue hourly maternal observations.

Review taken place within 3 hours?  YES  NO

Date: \_\_\_/\_\_\_/\_\_\_ Time: \_\_\_:\_\_\_

Antibiotics required?  YES  NO

YES

**START FAST-M BUNDLE NOW**

Review by clinical decision maker and actions **within ONE HOUR.**

**IF ANY RED FLAGS DEVELOP**

**LOW RISK OF SEPSIS**

Review and manage accordingly. Monitor inpatients with MEOWS chart. Educate outpatients on warning signs.

UNITED AGAINST MATERNAL SEPSIS

THINK SEPSIS, ACT FAST-M

### TREATMENT BUNDLE

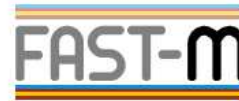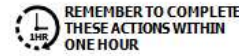

|                                     |          |                            |              |                                                  |          |
|-------------------------------------|----------|----------------------------|--------------|--------------------------------------------------|----------|
| Patient name                        |          |                            | Staff name   |                                                  |          |
| D.O.B or age                        |          |                            | Role / Cadre |                                                  |          |
| Patient ID                          |          |                            | Signature    |                                                  |          |
| Date & time of red flag observation | —/—/— :— | Date & time bundle started | —/—/— :—     | Date & time of review by clinical decision maker | —/—/— :— |

|                                |                                                                               |       |                       |     |                                                                                                              |
|--------------------------------|-------------------------------------------------------------------------------|-------|-----------------------|-----|--------------------------------------------------------------------------------------------------------------|
| <b>F</b>                       | <b>FLUIDS (caution in pre-eclampsia, severe anaemia and pulmonary oedema)</b> |       |                       |     |                                                                                                              |
|                                | Date                                                                          | —/—/— | Time fluids initiated | —:— | Initials                                                                                                     |
| Details / reason not completed |                                                                               |       |                       |     | Give 500 ml crystalloid immediately. Repeat 500 ml boluses to a maximum of 30 ml/kg if hypotension persists. |

|                                |                    |       |              |     |                                 |
|--------------------------------|--------------------|-------|--------------|-----|---------------------------------|
| <b>A</b>                       | <b>ANTIBIOTICS</b> |       |              |     |                                 |
|                                | Date               | —/—/— | Time started | —:— | Initials                        |
| Details / reason not completed |                    |       |              |     | See antibiotic guidelines below |

|                                |                                                            |       |                 |     |                                                     |
|--------------------------------|------------------------------------------------------------|-------|-----------------|-----|-----------------------------------------------------|
| <b>S</b>                       | <b>SOURCE – identify and treat the source of infection</b> |       |                 |     |                                                     |
|                                | Date                                                       | —/—/— | Time considered | —:— | Initials                                            |
| Details / reason not completed |                                                            |       |                 |     | See source identification and treatment boxes below |

|                      |                                                                                      |          |          |                              |                                                          |
|----------------------|--------------------------------------------------------------------------------------|----------|----------|------------------------------|----------------------------------------------------------|
| <b>T</b>             | <b>TRANSPORT (to higher level hospital or location within hospital, if required)</b> |          |          |                              |                                                          |
|                      | Date & time transport considered                                                     | —/—/— :— | Initials | Transport Required           | <input type="checkbox"/> YES <input type="checkbox"/> NO |
|                      | Date & time transport requested                                                      | —/—/— :— | Initials | <input type="checkbox"/> N/A |                                                          |
|                      | Date & time patient left facility                                                    | —/—/— :— | Initials |                              |                                                          |
|                      | Destination                                                                          |          |          |                              |                                                          |
| Reason for any delay |                                                                                      |          |          |                              |                                                          |

|                                          |                                                                                                                                                       |                                                                                                                                                                                                                                       |                                |  |  |
|------------------------------------------|-------------------------------------------------------------------------------------------------------------------------------------------------------|---------------------------------------------------------------------------------------------------------------------------------------------------------------------------------------------------------------------------------------|--------------------------------|--|--|
| <b>m</b>                                 | <b>MONITORING (start MEOWS chart if not already started. Repeat observations every 30 minutes until otherwise decided by clinical decision maker)</b> |                                                                                                                                                                                                                                       |                                |  |  |
|                                          | Date & time monitoring commenced                                                                                                                      | —/—/— :—                                                                                                                                                                                                                              | Details / reason not completed |  |  |
|                                          | Maternal / fetal monitoring should include                                                                                                            | <ul style="list-style-type: none"> <li>Respiratory rate</li> <li>Oxygen Saturations</li> <li>Temperature</li> <li>Heart rate</li> <li>Blood pressure</li> <li>Urine output</li> <li>Mental state</li> <li>Fetal heart rate</li> </ul> |                                |  |  |
| Neonatal monitoring and review commenced | <input type="checkbox"/> YES <input type="checkbox"/> NO <input type="checkbox"/> N/A                                                                 |                                                                                                                                                                                                                                       |                                |  |  |

|                                                                                                                                                                                                                                                                                                                                                                                                                                                                                                                                                                     |
|---------------------------------------------------------------------------------------------------------------------------------------------------------------------------------------------------------------------------------------------------------------------------------------------------------------------------------------------------------------------------------------------------------------------------------------------------------------------------------------------------------------------------------------------------------------------|
| <b>ANTIBIOTIC GUIDELINES</b>                                                                                                                                                                                                                                                                                                                                                                                                                                                                                                                                        |
| Insert local guidance here                                                                                                                                                                                                                                                                                                                                                                                                                                                                                                                                          |
| <p><b>Immediate treatment for Maternal Sepsis:</b></p> <ul style="list-style-type: none"> <li>Ceftriaxone 2 g IV once daily (if no IV access this can be given as 2 IM injections of 1 g in different sites).</li> <li>If possible intra-abdominal source add Metronidazole 500 mg IV three times daily or 400 mg PO three times daily.</li> </ul> <p><b>If above antibiotic regime is not available then give:</b></p> <ul style="list-style-type: none"> <li>Tazobactam 4.5 g IV daily two times a day</li> <li>Meropenem 1 g IV daily two times a day</li> </ul> |

|                                                                                                                                                                                                                                                                                                                                                                                                                                 |
|---------------------------------------------------------------------------------------------------------------------------------------------------------------------------------------------------------------------------------------------------------------------------------------------------------------------------------------------------------------------------------------------------------------------------------|
| <b>IDENTIFY THE SOURCE</b>                                                                                                                                                                                                                                                                                                                                                                                                      |
| <p><b>Consider</b></p> <ul style="list-style-type: none"> <li>Clinical history</li> <li>Clinical examination</li> <li>Blood tests (if available) (FBC, U&amp;Es, LFTs, CRP, clotting)</li> <li>Blood cultures</li> <li>HIV and Malaria testing</li> <li>Urine sample</li> <li>Swabs (wound, vagina, throat)</li> <li>Sputum sample</li> <li>Imaging (abdominal, chest)</li> <li>Lumbar puncture</li> <li>Other _____</li> </ul> |
| <b>REMOVE / TREAT THE SOURCE</b>                                                                                                                                                                                                                                                                                                                                                                                                |
| <p><b>Consider</b></p> <ul style="list-style-type: none"> <li>Malaria treatment</li> <li>Consider delivery of baby</li> <li>Removal of retained products of conception</li> <li>Debridement of wound / drainage of collection</li> <li>Removal of infected cannula / line</li> <li>Hysterectomy</li> <li>Targeted antibiotics once source known</li> </ul>                                                                      |

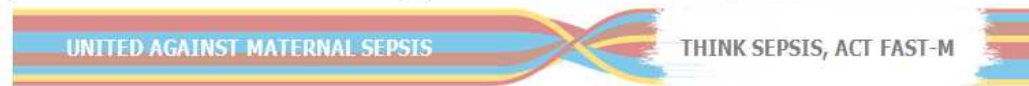

Supplement: inline-supplementary-material-5 [file inline-supplementary-material-5.pdf]
